# Supplementary material
Source: Springer Nature journal article supplement (https://www.springermedizin.de/resource/supplementary/12985_2008_506_MOESM2_ESM.pdf/9607900)

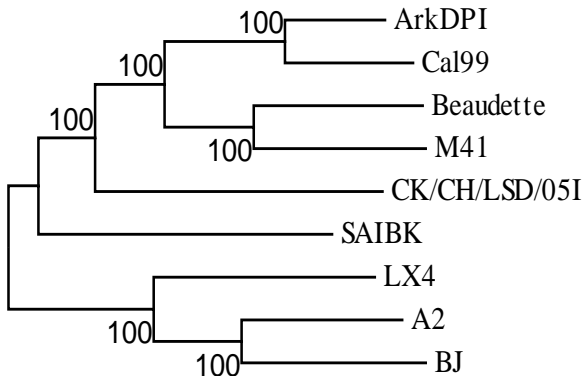

0.02

Supplement: MOESM2 [file 9607900]
